# Supplementary material for: Type-Specific Human Papillomavirus Biological Features: Validated Model-Based Estimates
Source: PubMed Central journal article supplement (PMC3882251; doi:10.1371/journal.pone.0081171), 2013-11-29
Supplement: pone.0081171.s002.pdf [file pone.0081171.s002.pdf]

Table S1.1. Sexually activity parameter values imposed to the modelled population, by country

| Class of sexual activity<br>(% of population) | Italy        |               |            | Sweden     |             |            |             |
|-----------------------------------------------|--------------|---------------|------------|------------|-------------|------------|-------------|
|                                               | Both Genders |               |            | Men        |             | Women      |             |
|                                               | Low<br>77%   | Medium<br>18% | High<br>5% | Low<br>85% | High<br>15% | Low<br>85% | High<br>15% |
| Age                                           |              |               |            |            |             |            |             |
| 14–19                                         | 0.34         | 2.34          | 5.67       | 0.54       | 4.11        | 0.25       | 2.89        |
| 20–24                                         | 0.33         | 2.32          | 13.46      | 0.54       | 4.11        | 0.25       | 2.89        |
| 25–29                                         | 0.44         | 2.66          | 9.22       | 0.54       | 4.11        | 0.25       | 2.89        |
| 30–34                                         | 0.44         | 2.60          | 7.23       | 0.05       | 0.64        | 0.07       | 1.47        |
| 35–39                                         | 0.47         | 2.54          | 5.87       | 0.05       | 0.64        | 0.07       | 1.47        |
| 40–44                                         | 0.47         | 2.37          | 4.97       | 0.05       | 0.64        | 0.07       | 1.47        |
| 45–59                                         | 0.46         | 2.39          | 6.60       | 0.05       | 0.64        | 0.07       | 1.47        |
| 60–75                                         | 0.00         | 0.00          | 0.00       | 0.01       | 0.21        | 0.02       | 0.11        |

Table S1.2. Mortality rates (per 1,000) imposed to the modelled population, by country

| Age   | Italy |       | Sweden |        |
|-------|-------|-------|--------|--------|
|       | Men   | Women | Men    | Women  |
| <20   | 0.9   | 0.32  | 0.267  | 0.166  |
| 20–24 | 1.16  | 0.36  | 0.727  | 0.258  |
| 25–29 | 1.15  | 0.46  | 0.707  | 0.264  |
| 30–34 | 1.27  | 0.58  | 0.712  | 0.357  |
| 35–39 | 1.65  | 0.8   | 0.842  | 0.458  |
| 40–44 | 2.35  | 1.26  | 1.483  | 0.909  |
| 45–49 | 3.97  | 2.14  | 1.919  | 1.229  |
| 50–54 | 6.91  | 3.19  | 3.921  | 2.561  |
| 55–59 | 12.03 | 5.15  | 5.069  | 3.31   |
| 60–64 | 19.45 | 8.06  | 10.254 | 6.331  |
| 65–69 | 28.93 | 13.26 | 13.814 | 8.238  |
| 70–74 | 46.33 | 23.54 | 29.337 | 16.98  |
| 75–79 | 74.2  | 42.43 | 39.928 | 23.658 |
