# Supplementary material for: Type-Specific Human Papillomavirus Biological Features: Validated Model-Based Estimates
Source: PubMed Central journal article supplement (PMC3882251; doi:10.1371/journal.pone.0081171), 2013-11-29

Figure S2.1. Estimated median cumulative probability (%) of HPV infection clearance, by HPV type and country.

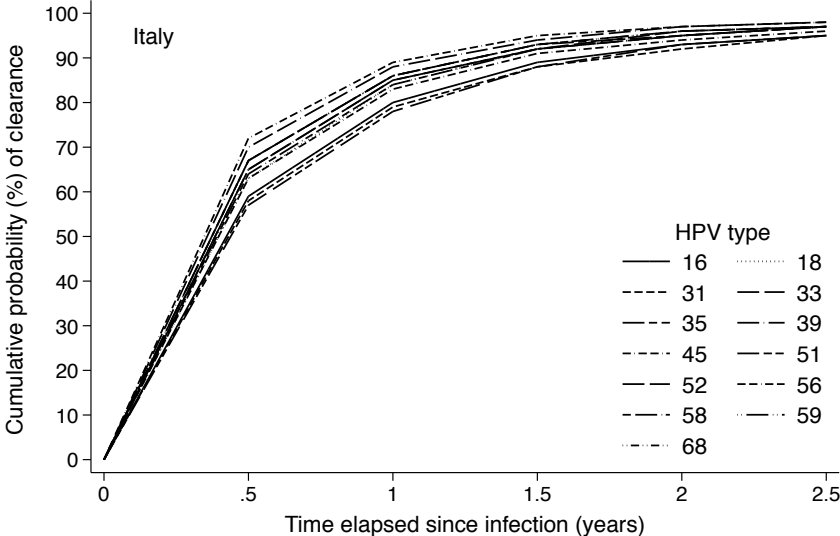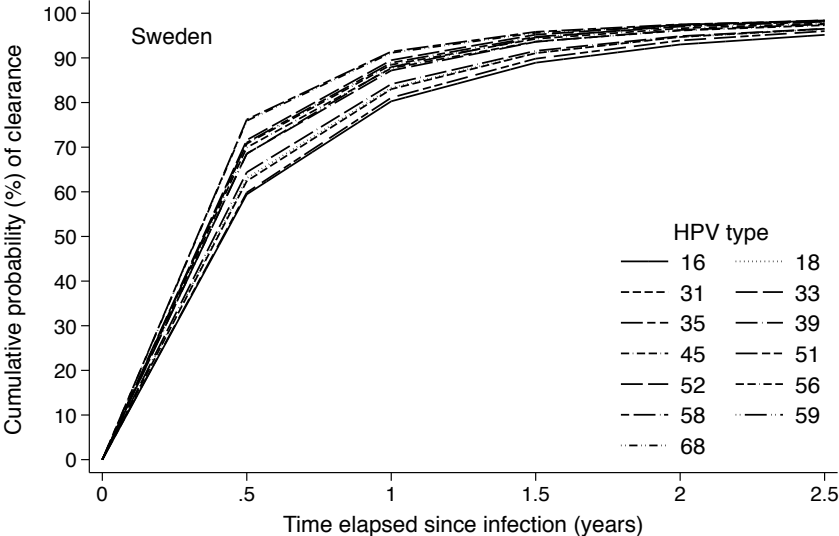

Supplement: pone.0081171.s004.pdf [file pone.0081171.s004.pdf]
