# Supplementary material for: Type-Specific Human Papillomavirus Biological Features: Validated Model-Based Estimates
Source: PubMed Central journal article supplement (PMC3882251; doi:10.1371/journal.pone.0081171), 2013-11-29

Figure S2.2. Fit between observed age-specific HPV16 and 18 prevalence and the 100 best fitting estimated curves, by country.

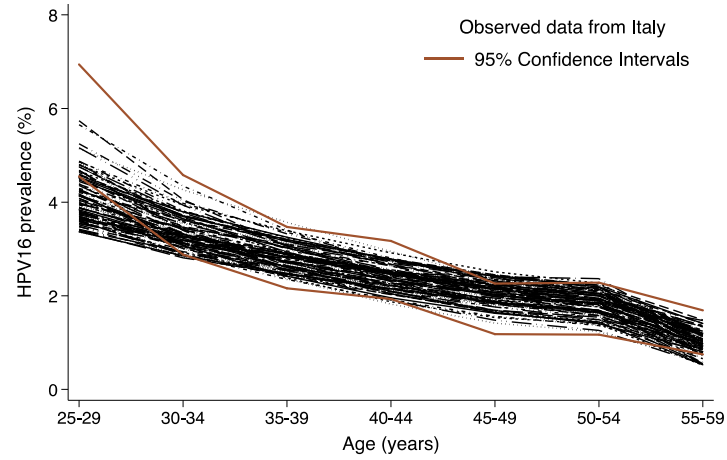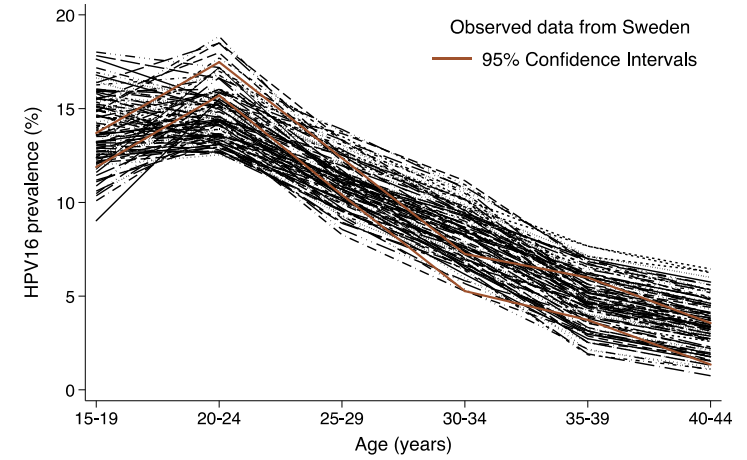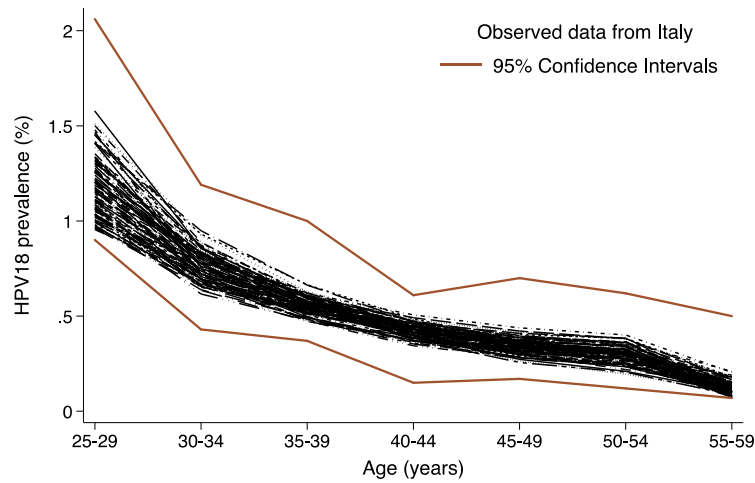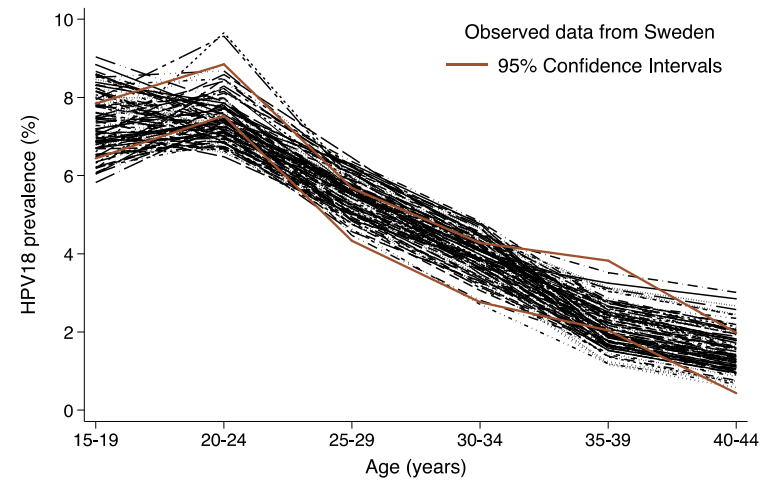

Figure S2.3. Fit between observed age-specific HPV31 and 33 prevalence and the 100 best fitting estimated curves, by country.

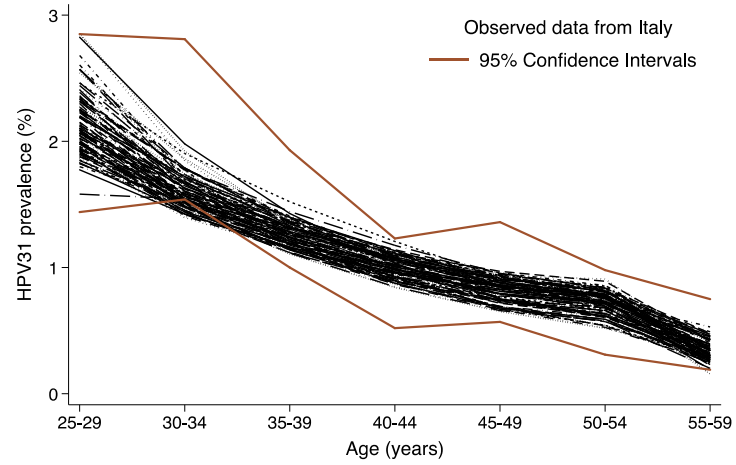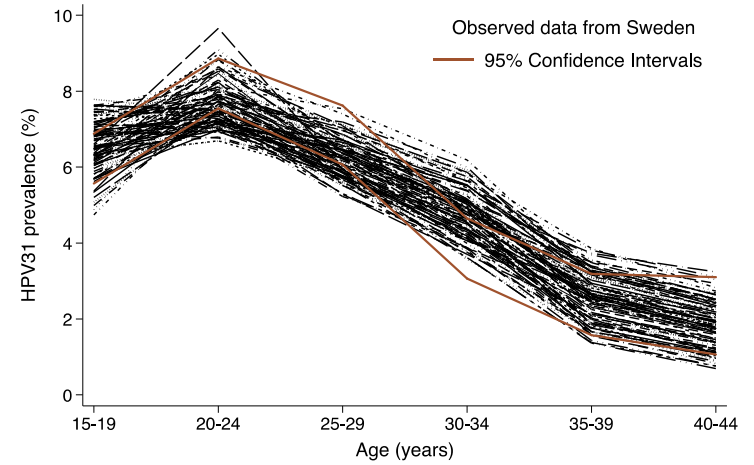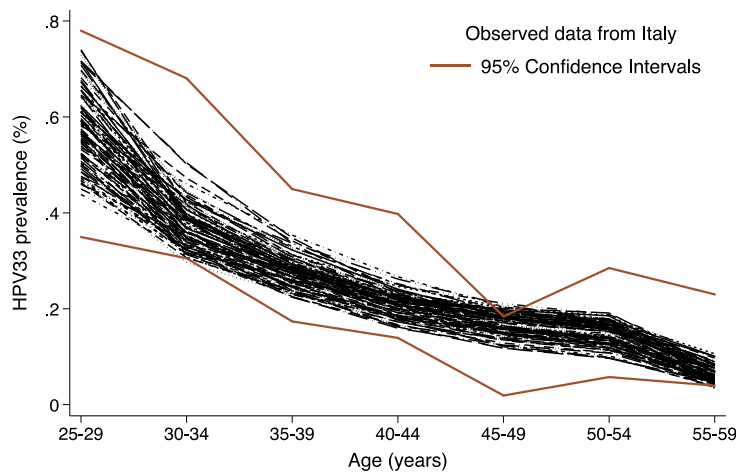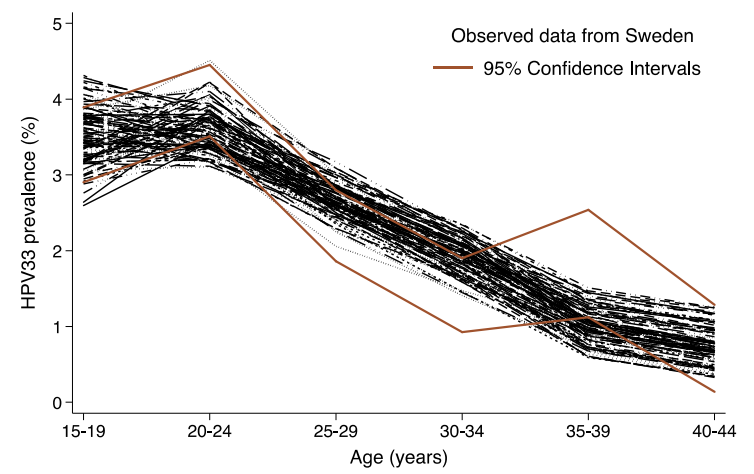

Figure S2.4. Fit between observed age-specific HPV35 and 39 prevalence and the 100 best fitting estimated curves, by country.

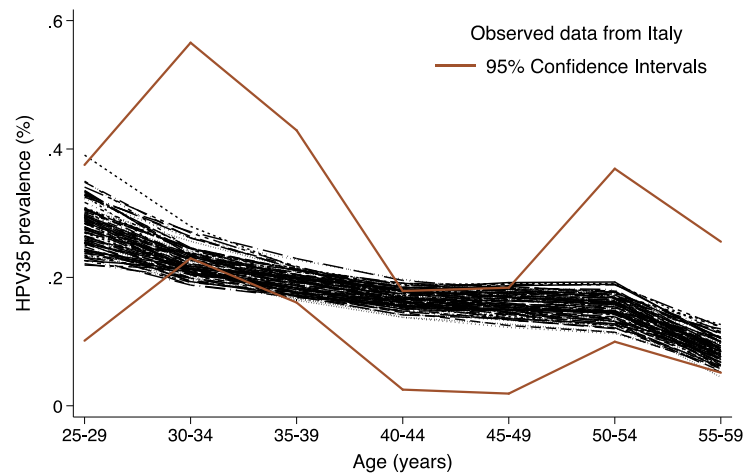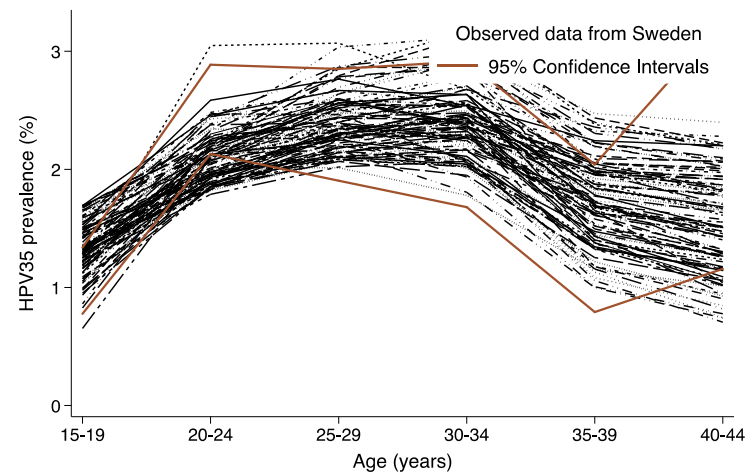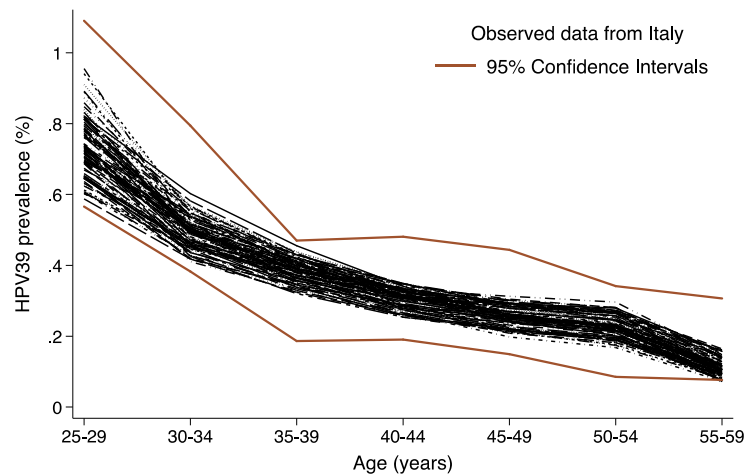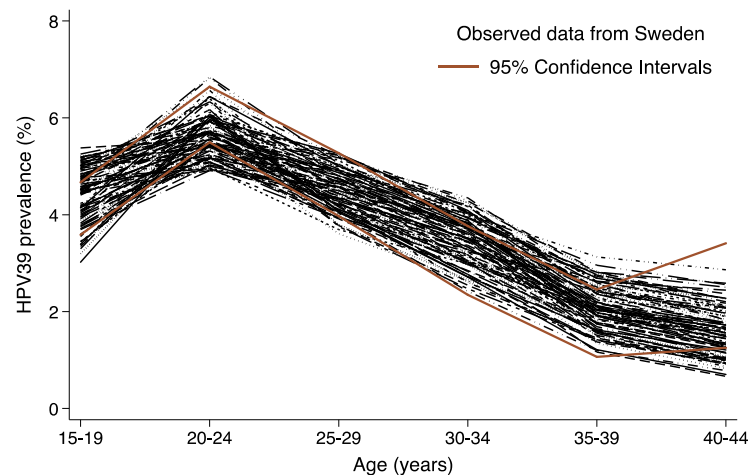

Supplement: pone.0081171.s005.pdf [file pone.0081171.s005.pdf]
