# Supplementary material for: Type-Specific Human Papillomavirus Biological Features: Validated Model-Based Estimates
Source: PubMed Central journal article supplement (PMC3882251; doi:10.1371/journal.pone.0081171), 2013-11-29

Figure S2.5. Fit between observed age-specific HPV45 and 51 prevalence and the 100 best fitting estimated curves, by country.

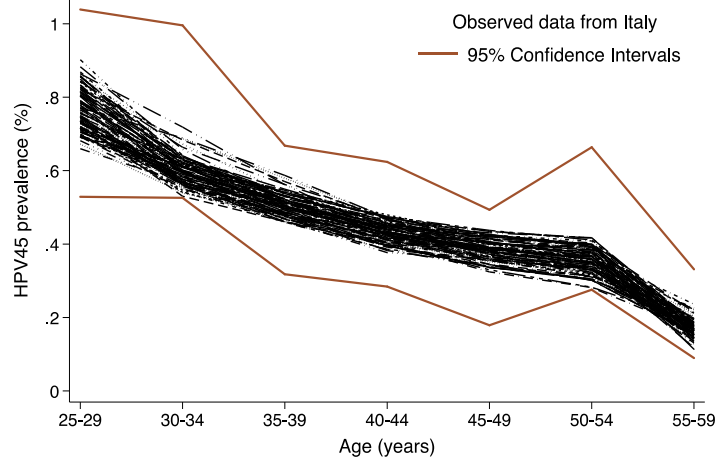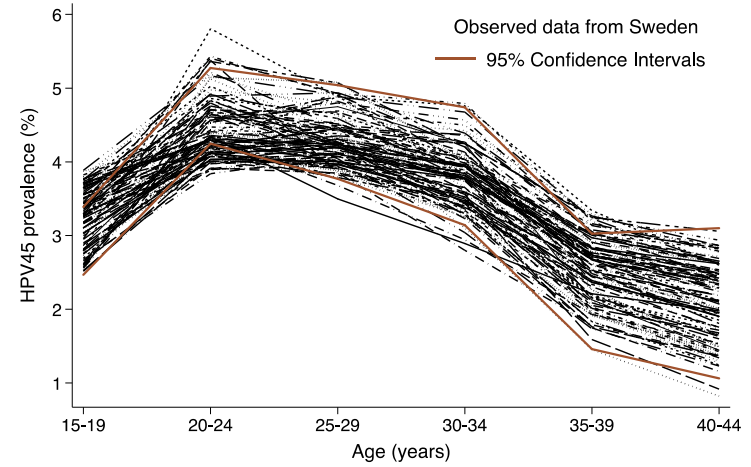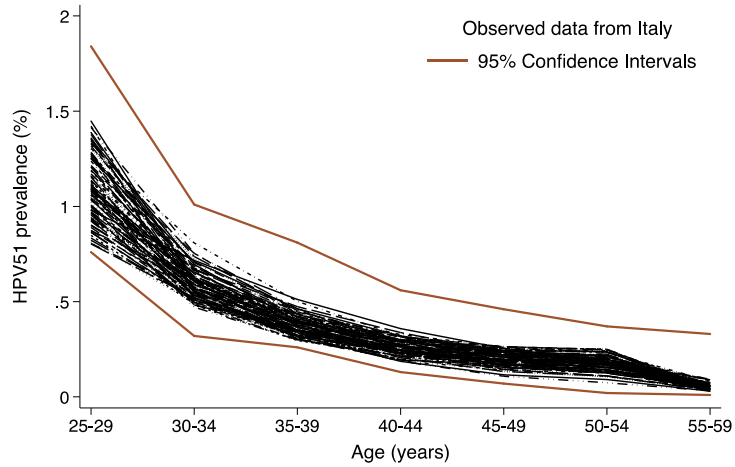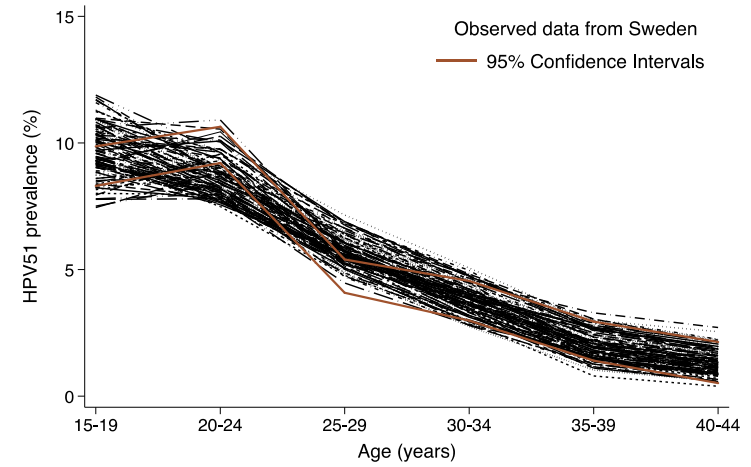

Figure S2.6. Fit between observed age-specific HPV52 and 56 prevalence and the 100 best fitting estimated curves, by country.

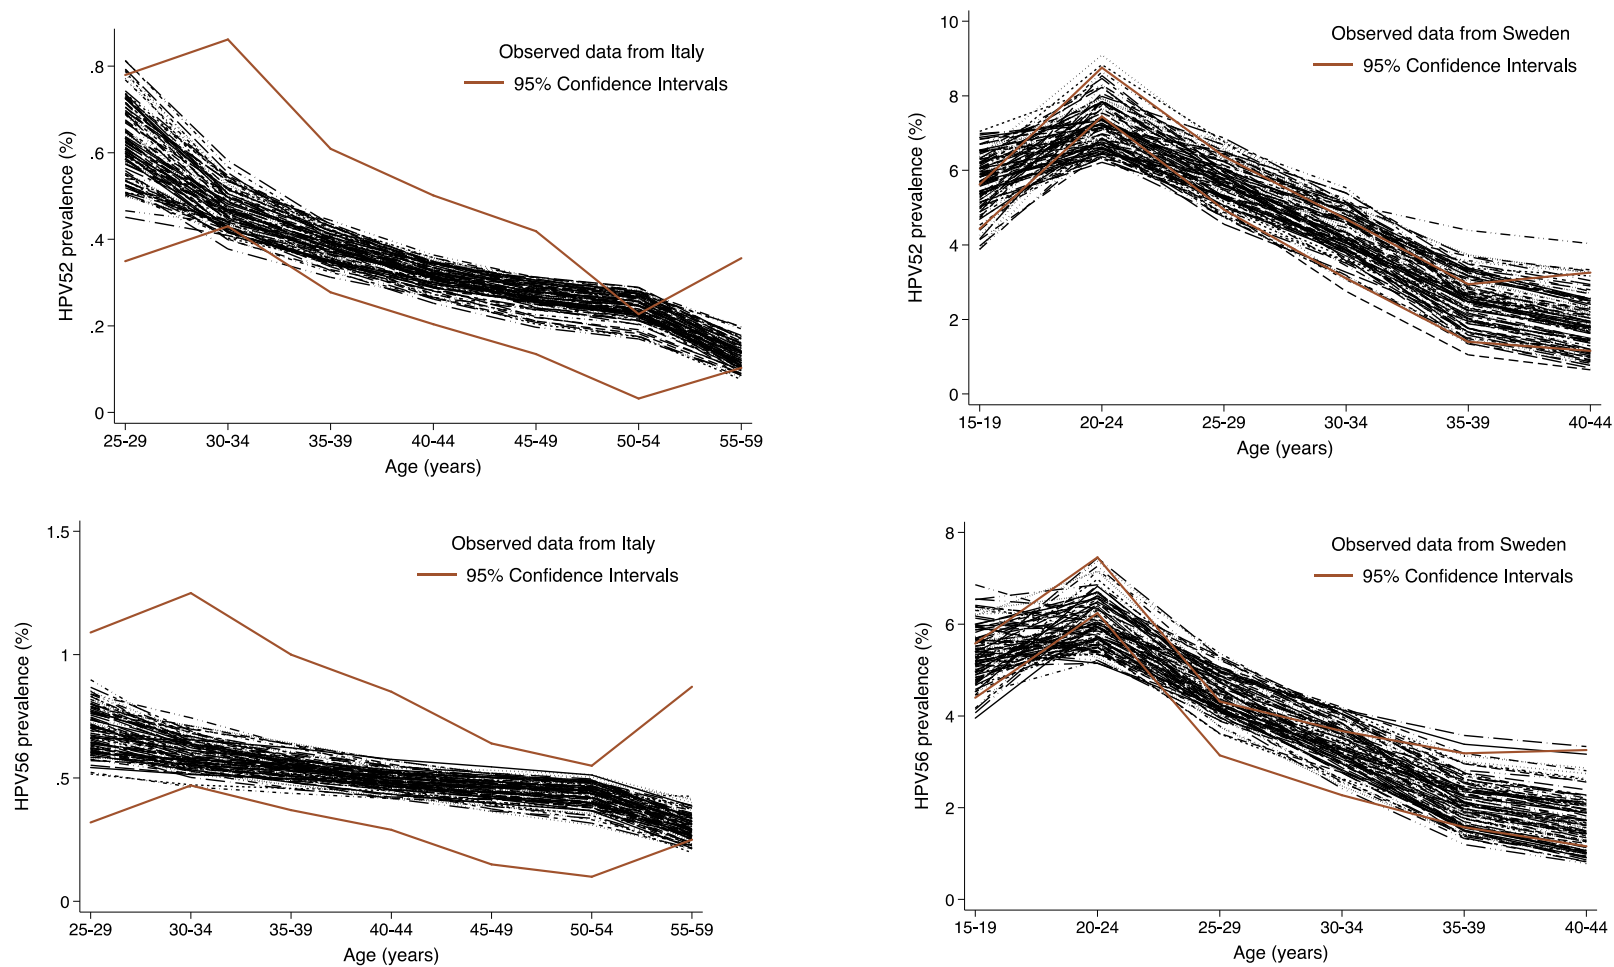

Figure S2.7. Fit between observed age-specific HPV58 and 59 prevalence and the 100 best fitting estimated curves, by country.

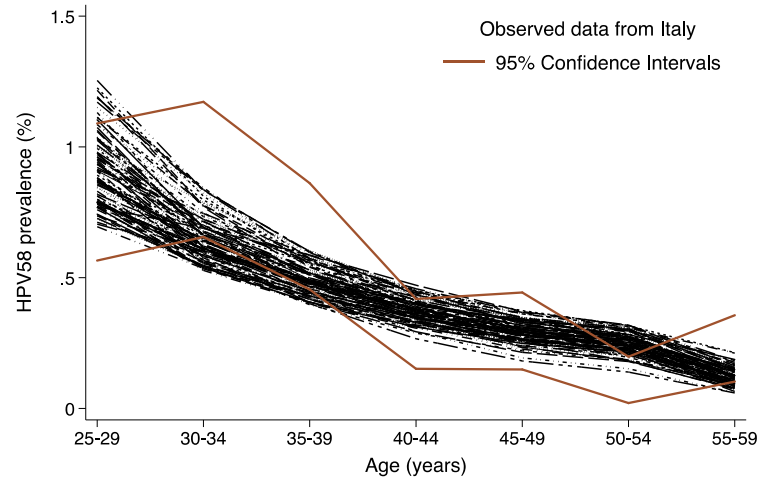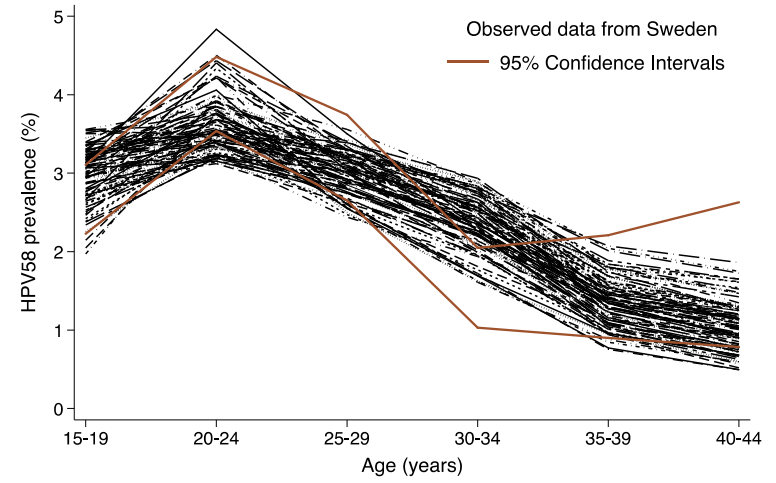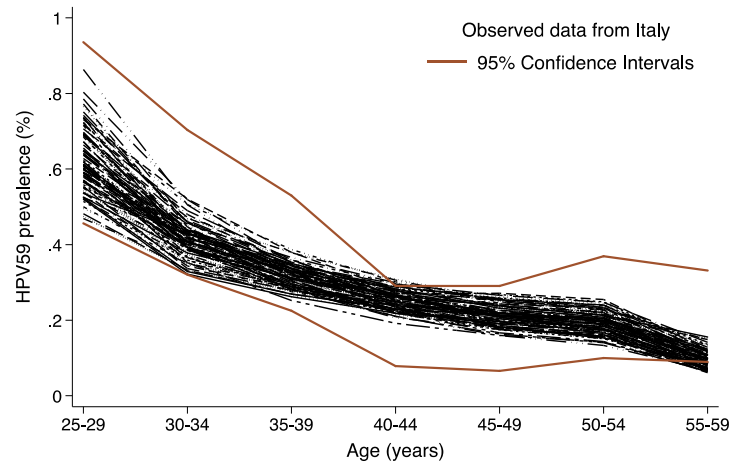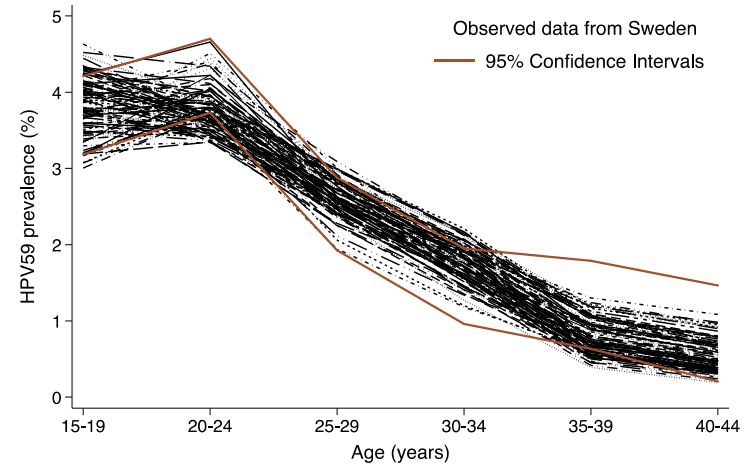

Figure S2.8. Fit between observed age-specific HPV68 prevalence and the 100 best fitting estimated curves, by country.

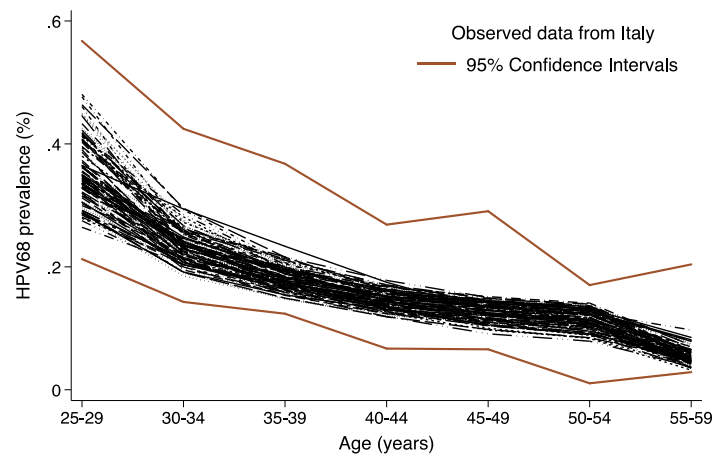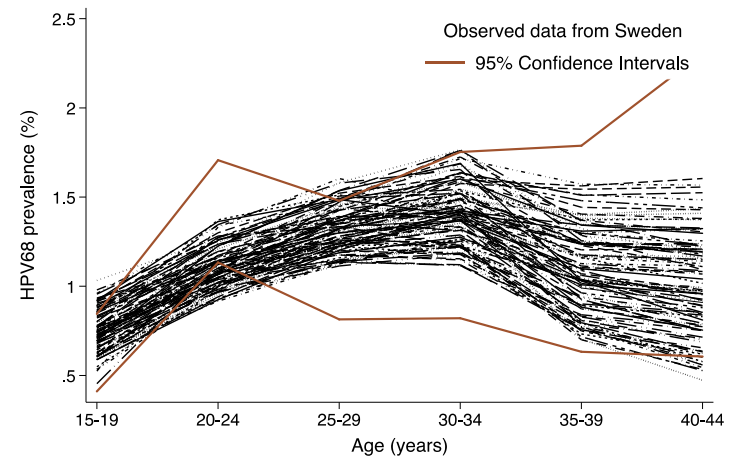

Supplement: pone.0081171.s006.pdf [file pone.0081171.s006.pdf]
