# Supplementary material for: Type-Specific Human Papillomavirus Biological Features: Validated Model-Based Estimates
Source: PubMed Central journal article supplement (PMC3882251; doi:10.1371/journal.pone.0081171), 2013-11-29
Supplement: pone.0081171.s007.pdf [file pone.0081171.s007.pdf]

Figure S2.9: Sensitivity analysis for HPV16 model, Italy. Univariate quadratic regressions: dependent variable log-likelihood, independents variables input parameters.

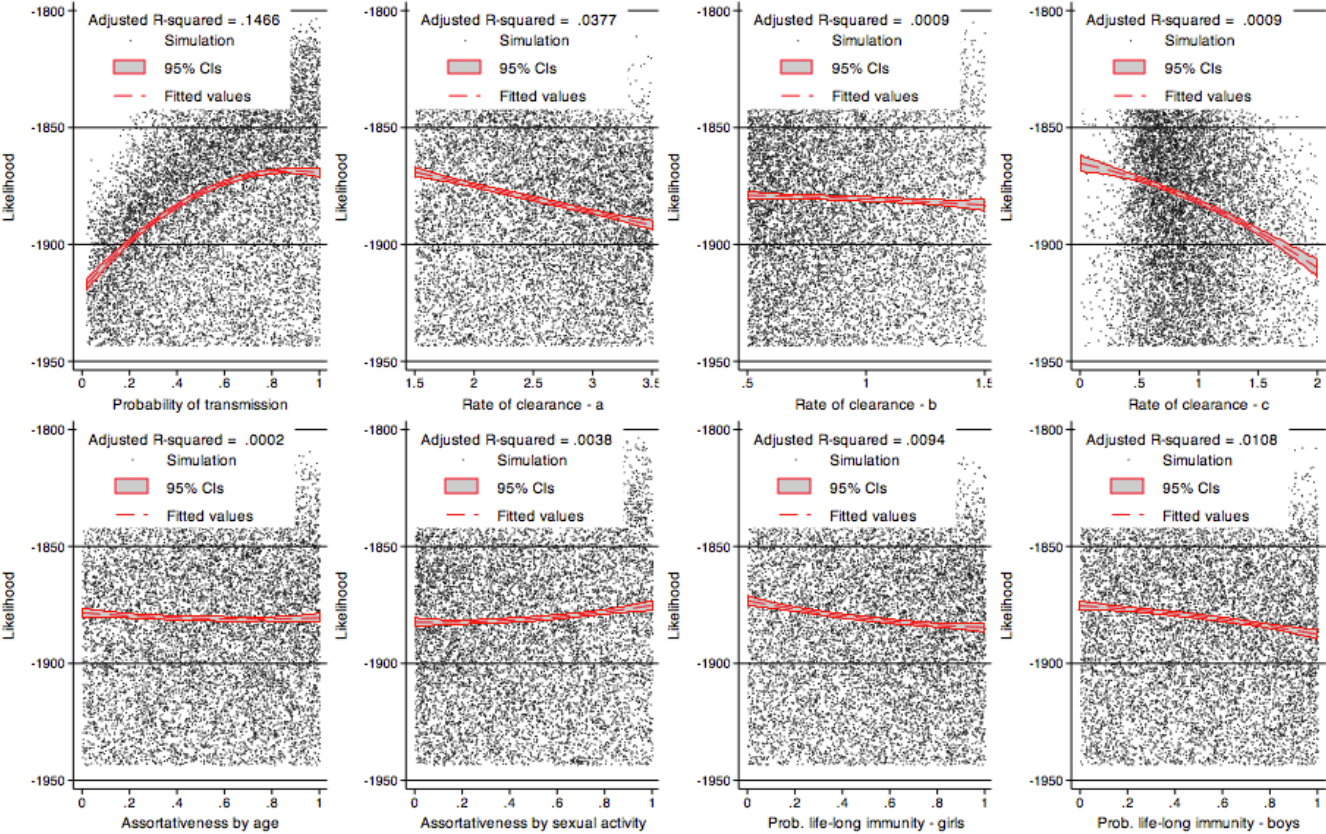

Multivariable model adjusted R-squared = 0.21

Figure S2.10: Sensitivity analysis for HPV16 model, Sweden. Univariate quadratic regressions: dependent variable log-likelihood, independents variables input parameters.

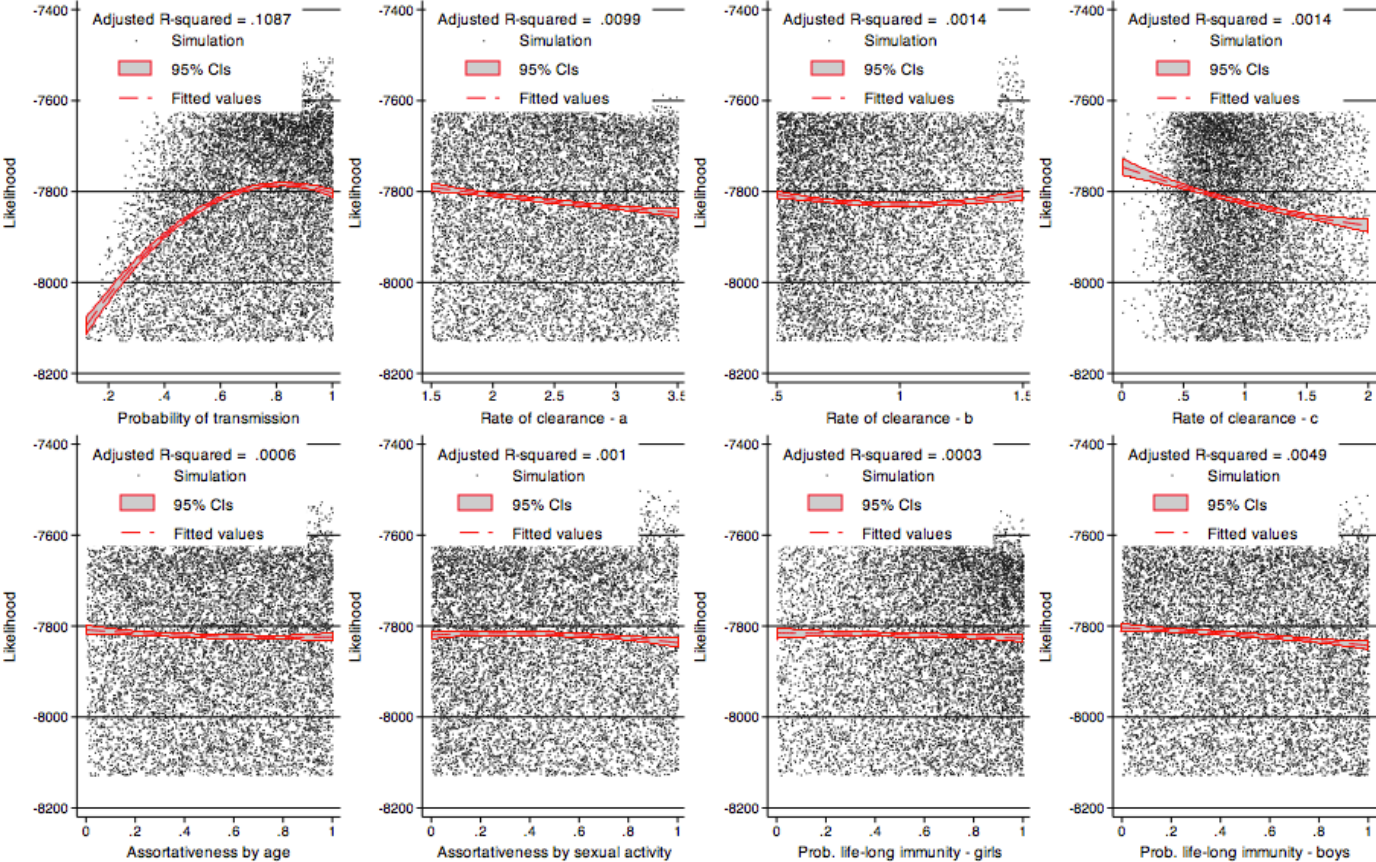

Multivariable model adjusted R-squared = 0.16

Figure S2.11: Sensitivity analysis for HPV18 model, Italy. Univariate quadratic regressions: dependent variable log-likelihood, independents variables input parameters.

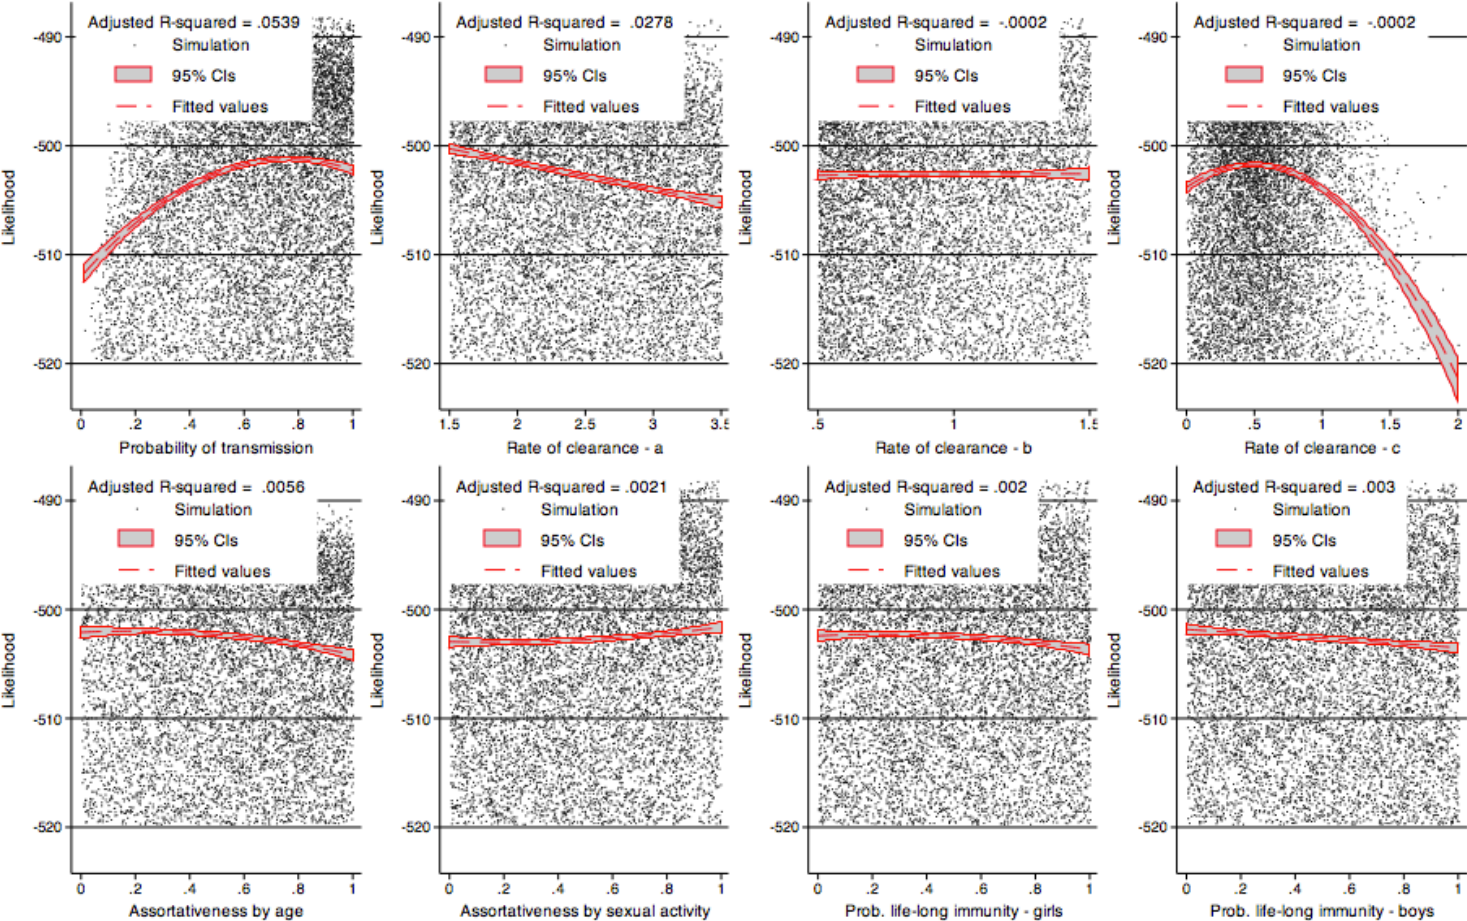

Multivariable model adjusted R-squared = 0.16

Figure S2.12: Sensitivity analysis for HPV18 model, Sweden. Univariate quadratic regressions: dependent variable log-likelihood, independents variables input parameters.

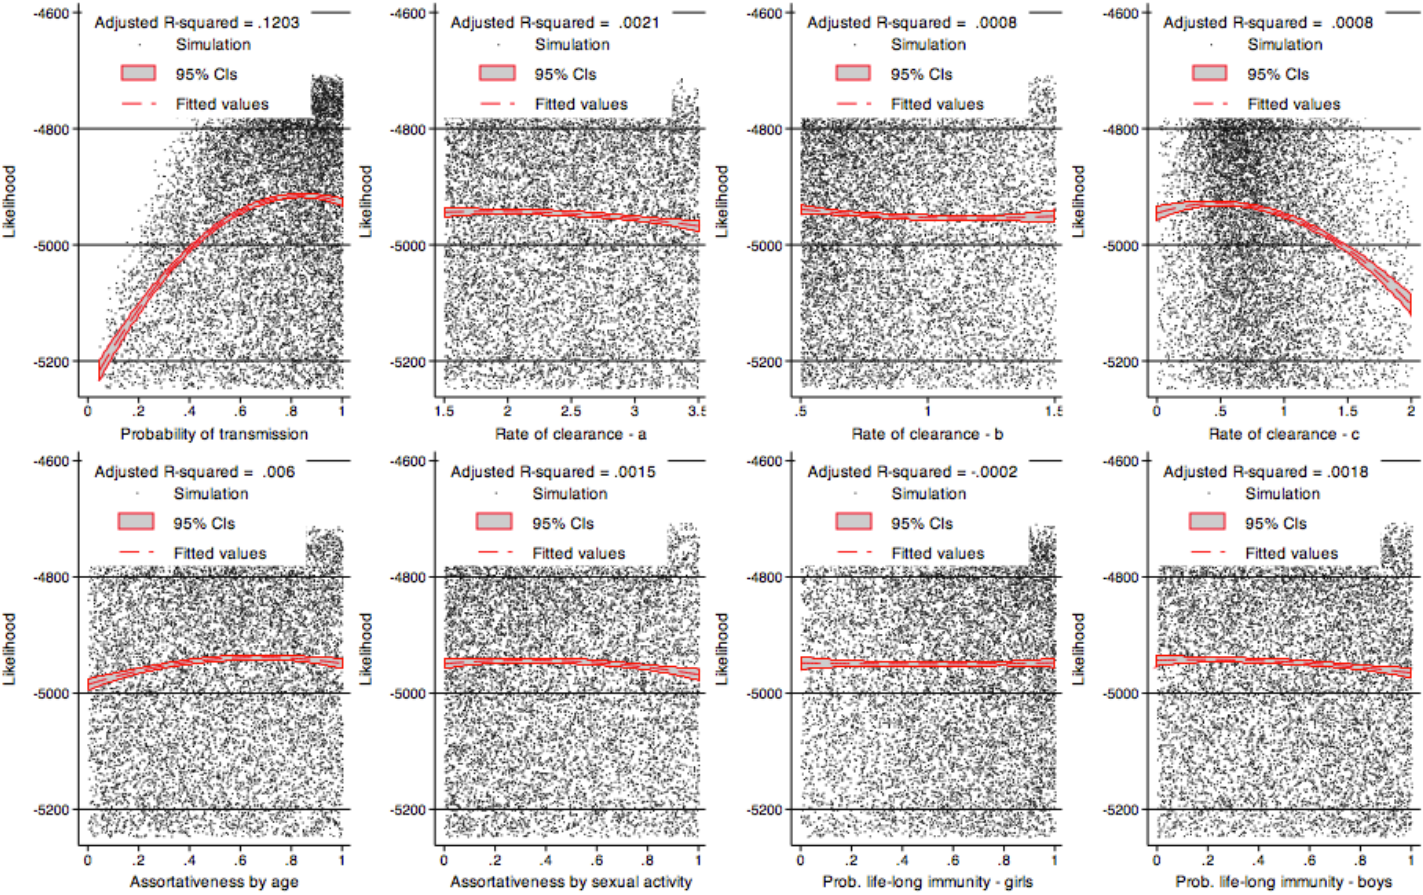

Multivariable model adjusted R-squared = 0.16

Figure S2.13: Sensitivity analysis for HPV16 model. Bivariate quadratic regressions: dependent variable log-likelihood, independent variables input parameters.

### Italy

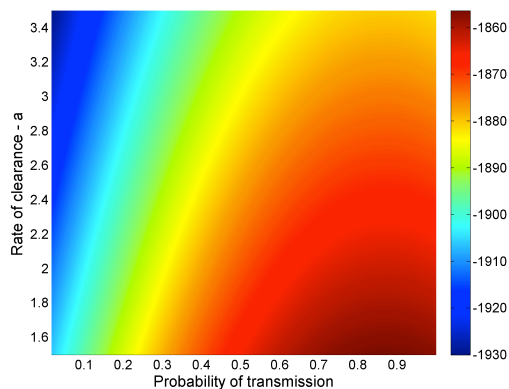

Adjusted R-squared: 0.188

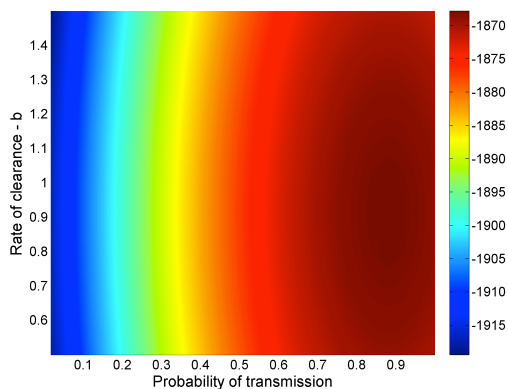

Adjusted R-squared: 0.147

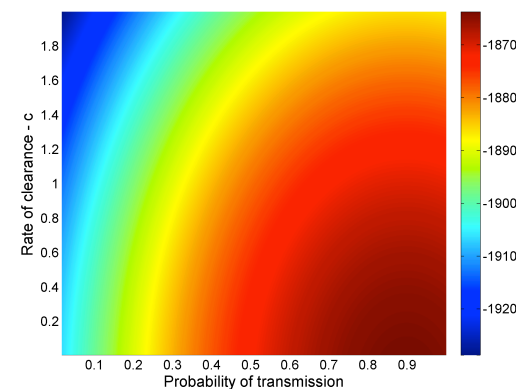

Adjusted R-squared: 0.161

### Sweden

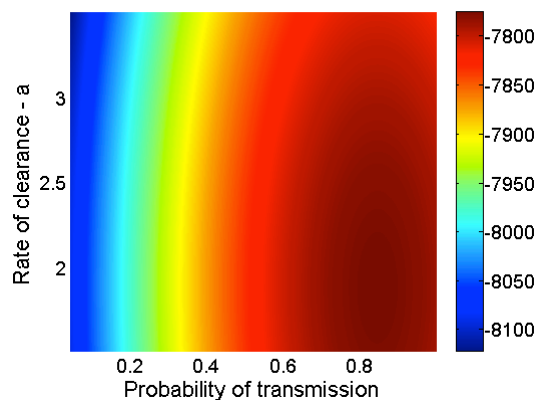

Adjusted R-squared: 0.124

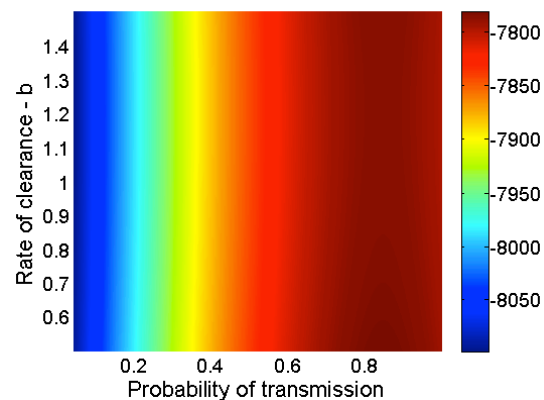

Adjusted R-squared: 0.110

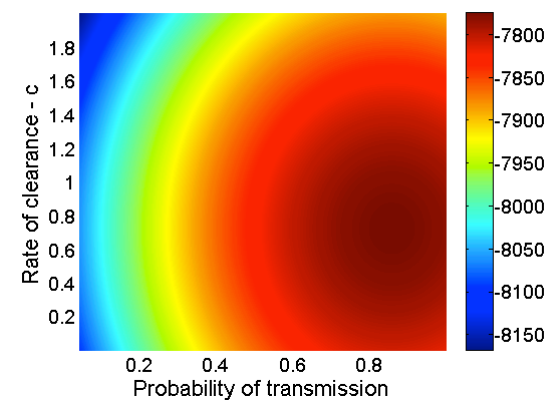

Adjusted R-squared: 0.118

Figure S2.14: Sensitivity analysis for HPV18 model. Bivariate quadratic regressions: dependent variable log-likelihood, independents variables input parameters.

### Italy

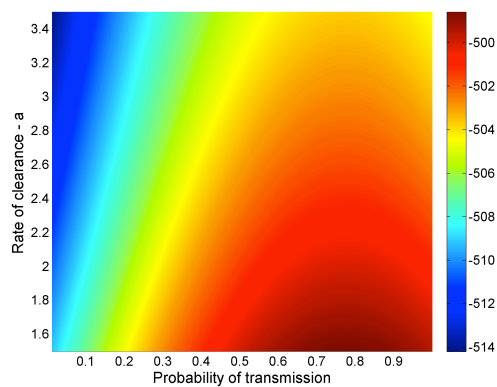

Adjusted R-squared: 0.084

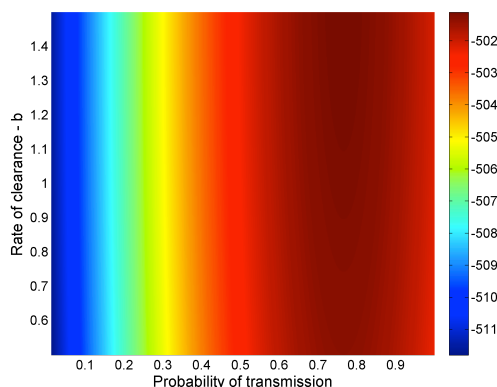

Adjusted R-squared: 0.054

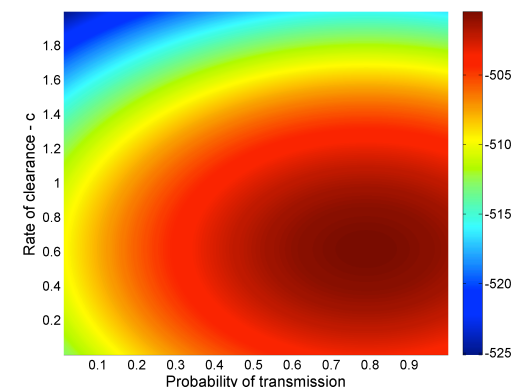

Adjusted R-squared: 0.073

### Sweden

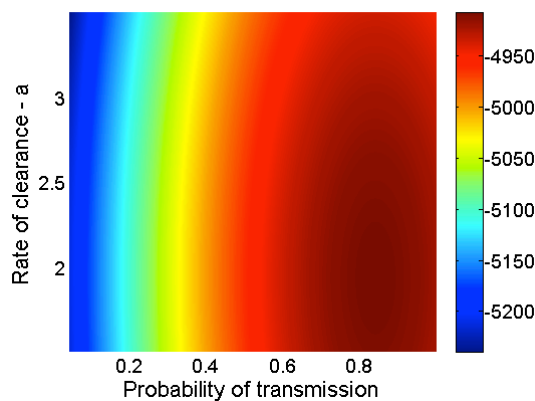

Adjusted R-squared: 0.123

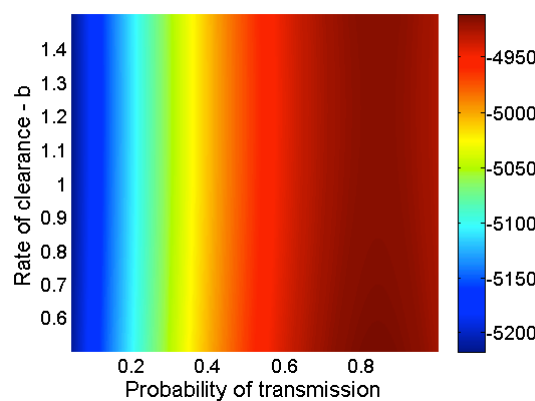

Adjusted R-squared: 0.120

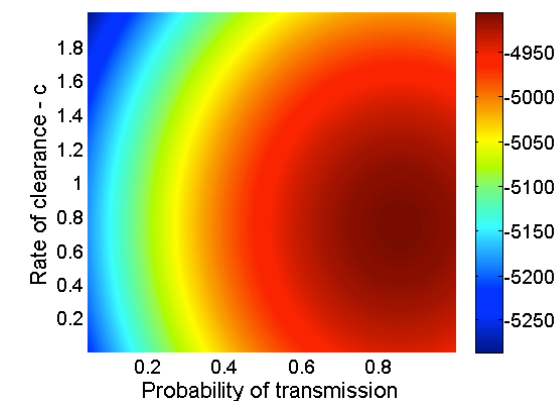

Adjusted R-squared: 0.131
