# Supplementary material for: Type-Specific Human Papillomavirus Biological Features: Validated Model-Based Estimates
Source: PubMed Central journal article supplement (PMC3882251; doi:10.1371/journal.pone.0081171), 2013-11-29

Figure S2.15. Age-specific HPV16, 18, 31, and 33 prevalence (%), by country.

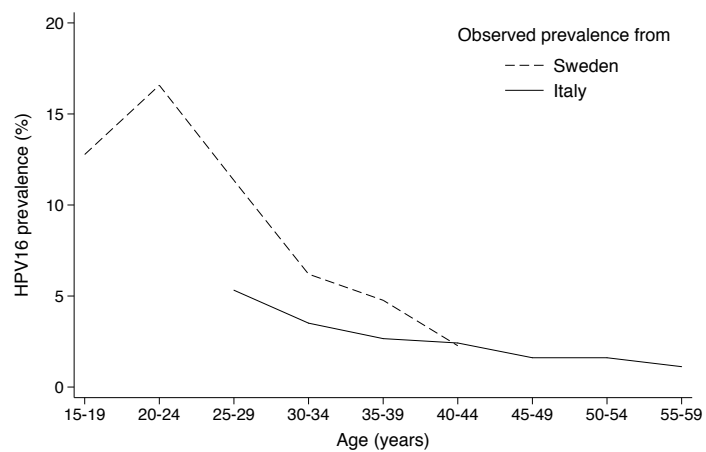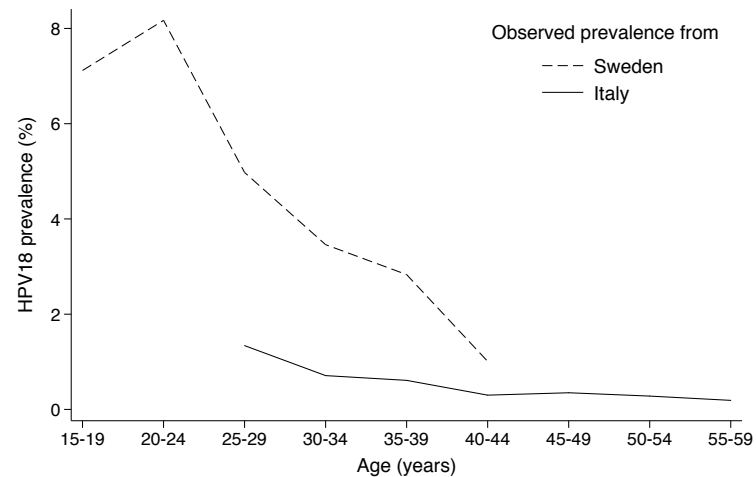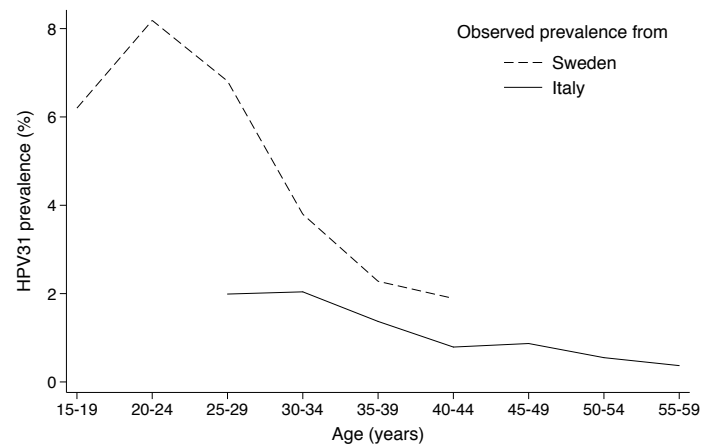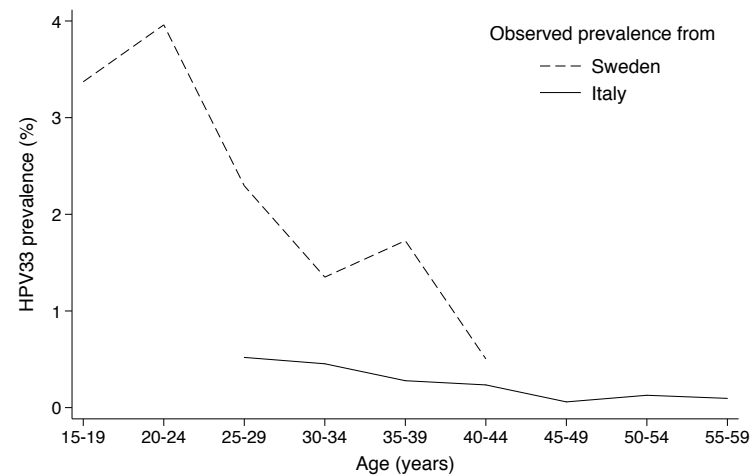

Figure S2.16. Age-specific HPV35, 39, 45, and 51 prevalence (%), by country.

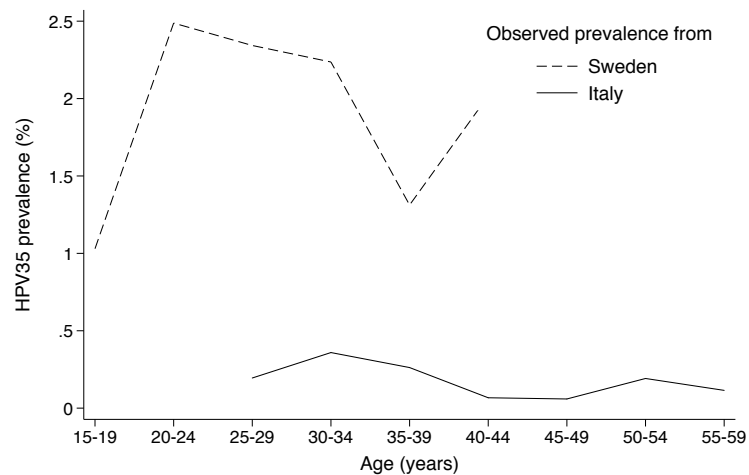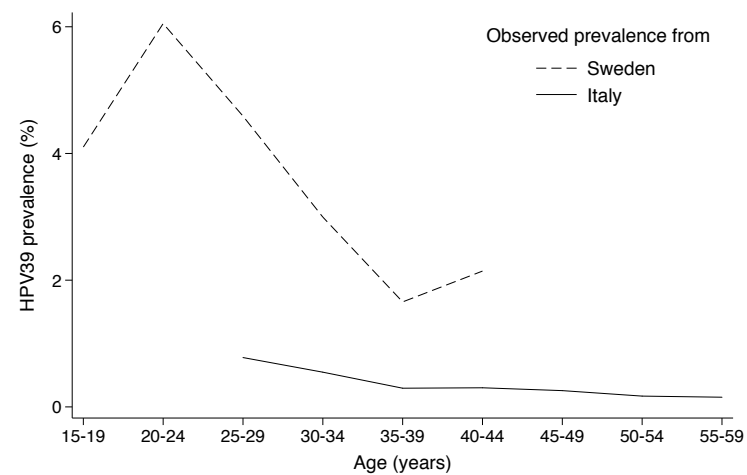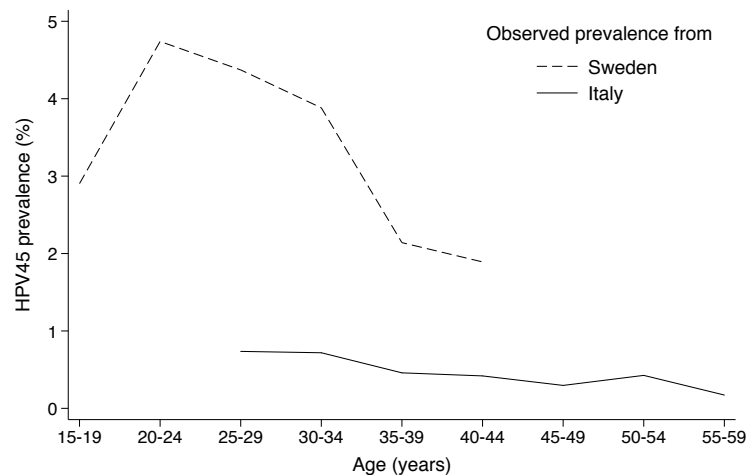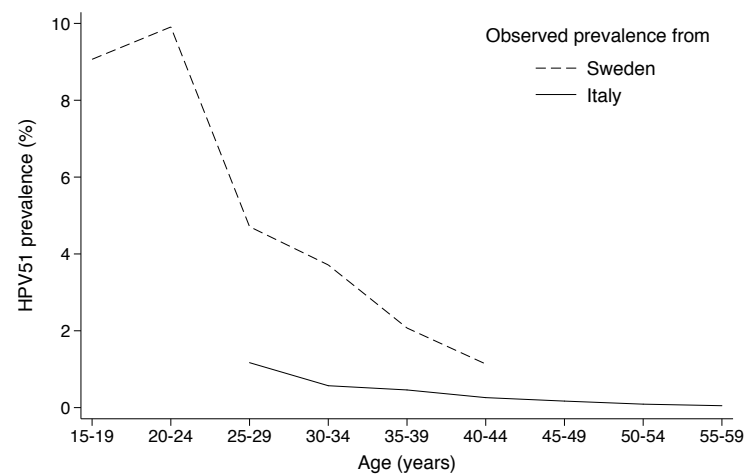

Figure S2.17. Age-specific HPV52, 56, 58, and 59 prevalence (%), by country.

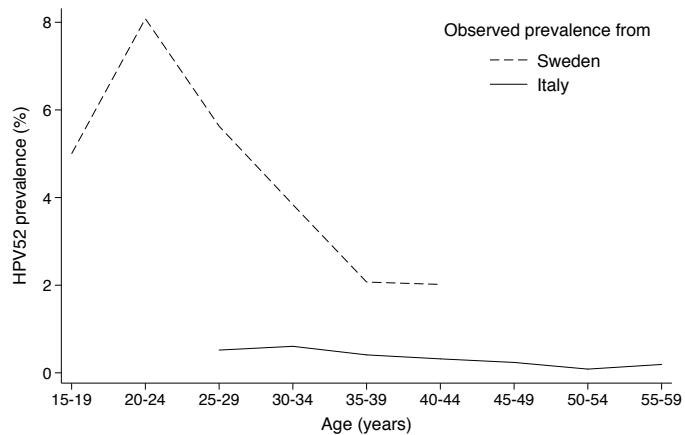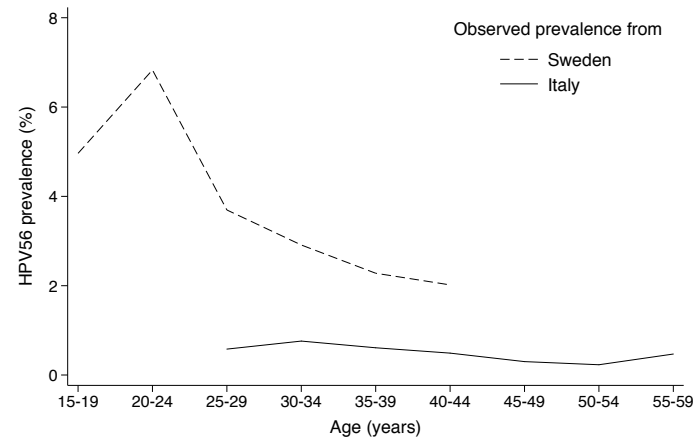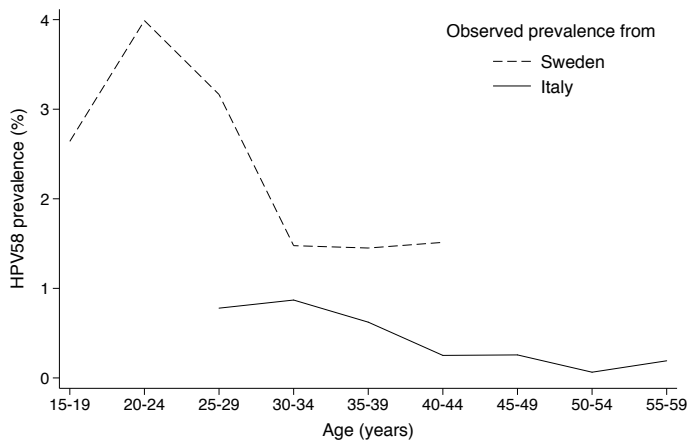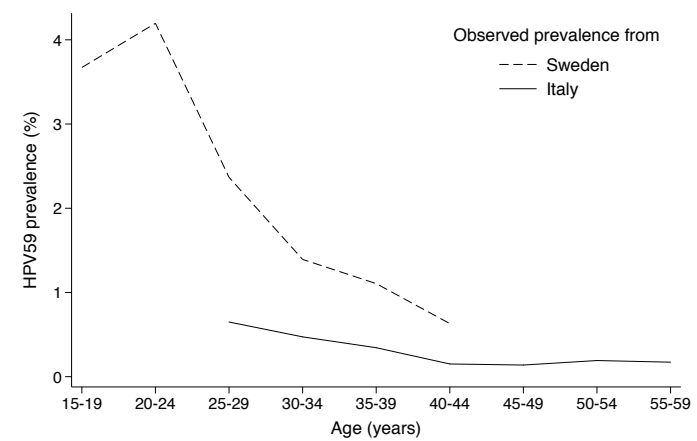

Figure S2.18. Age-specific HPV68 prevalence (%), by country.

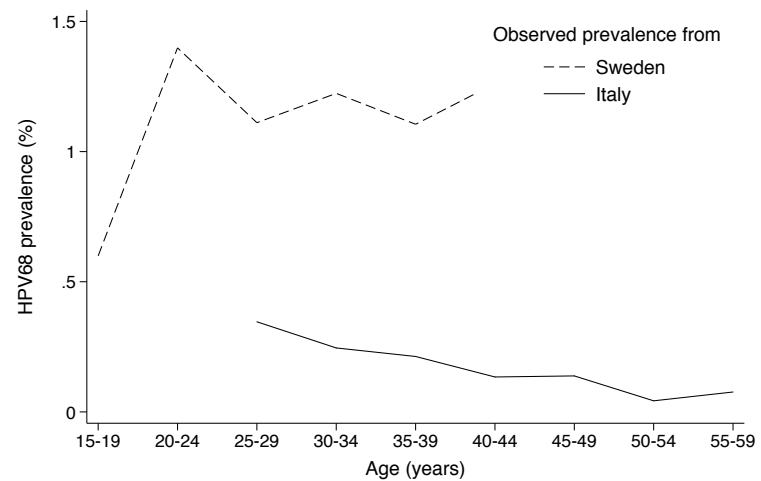

Supplement: pone.0081171.s008.pdf [file pone.0081171.s008.pdf]
