# Supplementary material for: Type-Specific Human Papillomavirus Biological Features: Validated Model-Based Estimates
Source: PubMed Central journal article supplement (PMC3882251; doi:10.1371/journal.pone.0081171), 2013-11-29
Supplement: pone.0081171.s009.pdf [file pone.0081171.s009.pdf]

Table S3.1. Summary of selected characteristics (HPV type investigated, probability of transmission per sexual partnership, rates and patterns of clearance, and method of finding validation) of published dynamic transmission models.

| Publication                | HPV type | Transmission per sexual partnership<br>(or per intercourse*) |            | Rate of clearance<br>(or rate of loss of natural immunity**) |                                                                                              |            | Validation             |
|----------------------------|----------|--------------------------------------------------------------|------------|--------------------------------------------------------------|----------------------------------------------------------------------------------------------|------------|------------------------|
|                            |          | Values<br>(probability)                                      | Source     | Pattern of immune response following infection clearance (%) | Values<br>(person-year)                                                                      | Source     |                        |
| Hughes et al., 2002 (12)   | HR       | Males to females: 0.8<br>Females to males: 0.7               | Assumed    | SIR                                                          | 0.67                                                                                         | Assumed    | Not reported           |
| Taira et al., 2004 (13)    | 16/18    | Decreasing with age: 0.35 to 0.15                            | Calibrated | SIS                                                          | Decreasing with age: 0.67 to 0.07                                                            | Calibrated | Against published data |
| Barnabas et al., 2006 (16) | 16       | 0.6                                                          | Calibrated | SIR                                                          | HPV infection<br>15-29 yrs: 0.4<br>30+ yrs: 0.1<br>LSIL clearance<br>15-34: 0.1<br>35+: 0.06 | Assumed    | Not reported           |

| Publication                 | HPV type | Transmission per sexual partnership<br>(or per intercourse*) |            | Rate of clearance<br>(or rate of loss of natural immunity**) |                                                                   |            | Validation             |
|-----------------------------|----------|--------------------------------------------------------------|------------|--------------------------------------------------------------|-------------------------------------------------------------------|------------|------------------------|
|                             |          | Values<br>(probability)                                      | Source     | Pattern of immune response following infection clearance (%) | Values<br>(person-year)                                           | Source     |                        |
| Kim et al.,<br>2007 (20)    | 16       | 0.39                                                         | Calibrated | SIS/SIR<br>(50.5/49.5)                                       | 0.9                                                               | Calibrated | Against published data |
|                             | 18       | 0.33                                                         | Calibrated | SIS/SIR<br>(53.3/46.7)                                       |                                                                   |            |                        |
| Elbasha et al., 2007 (14)   | 16/18    | Males to females: 0.8                                        | Assumed    | SIR                                                          | 0.83                                                              | Assumed    | Against published data |
|                             |          | Females to males: 0.7                                        | Assumed    |                                                              |                                                                   |            |                        |
| Choi et al.,<br>2010 (42)   | 16       | 0.36                                                         | Calibrated | SIS or SIR                                                   | Decreasing with time elapsed since infection: values not reported | Calibrated | Not reported           |
|                             | 18       | 0.18                                                         |            |                                                              |                                                                   |            |                        |
| Bogaaards et al., 2010 (15) | 16       | 0.8                                                          | Calibrated | SIRS                                                         | 0.041**                                                           | Calibrated | Not reported           |
|                             | 18       | 0.93                                                         |            |                                                              | 0.029**                                                           |            |                        |
|                             | 31       | 0.74                                                         |            |                                                              | 0.04**                                                            |            |                        |
|                             | 33       | 0.9                                                          |            |                                                              | 0.037**                                                           |            |                        |
|                             | 35       | 0.92                                                         |            |                                                              | 0.033**                                                           |            |                        |
|                             | 39       | 0.71                                                         |            |                                                              | 0.027**                                                           |            |                        |
|                             | 45       | 0.79                                                         |            |                                                              | 0.038**                                                           |            |                        |
| 51                          | 0.9      | 0.037**                                                      |            |                                                              |                                                                   |            |                        |

| Publication                    | HPV type | Transmission per sexual partnership<br>(or per intercourse*) |            | Rate of clearance<br>(or rate of loss of natural immunity**) |                                                   |            | Validation                        |
|--------------------------------|----------|--------------------------------------------------------------|------------|--------------------------------------------------------------|---------------------------------------------------|------------|-----------------------------------|
|                                |          | Values<br>(probability)                                      | Source     | Pattern of immune response following infection clearance (%) | Values<br>(person-year)                           | Source     |                                   |
|                                | 52       | 0.83                                                         |            |                                                              | 0.024**                                           |            |                                   |
|                                | 56       | 0.9                                                          |            |                                                              | 0.047**                                           |            |                                   |
|                                | 58       | 0.74                                                         |            |                                                              | 0.043**                                           |            |                                   |
|                                | 59       | 0.85                                                         |            |                                                              | 0.016**                                           |            |                                   |
|                                | 66       | 0.94                                                         |            |                                                              | 0.032**                                           |            |                                   |
|                                | 68       | 0.43                                                         |            |                                                              | 0.014**                                           |            |                                   |
| Zechmeister et al., 2009 (26)  | 16       | 0.6                                                          | Calibrated | SIRS                                                         | 0.9                                               | Assumed    | Against published data            |
|                                | 18       | 0.1                                                          |            |                                                              | 1.3                                               |            |                                   |
|                                | HR       | 0.3                                                          |            |                                                              | 0.6                                               |            |                                   |
| Olsen J et al., 2010 (25)      | 16       | 0.3*                                                         | Assumed    | SIS/SIR (55/45)                                              | HPV to Sus: 0.92                                  | Assumed    | Against published data            |
|                                | 18       | 0.13*                                                        |            |                                                              | CIN1 to Sus: 0.33                                 |            |                                   |
|                                |          |                                                              |            |                                                              | HPV to Sus: 1.1                                   |            |                                   |
|                                |          |                                                              |            |                                                              | CIN1 to Sus: 0.33                                 |            |                                   |
| Van de Velde et al., 2010 (21) | 16       | Males to females: 0.88*<br>Females to males: 0.72*           | Calibrated | Girls: SIS/SIR (54/46)<br>Boys: SIS/SIR (45/55)              | Range (by age)<br>Girls: 0.6-1.7<br>Boys: 0.4-1.7 | Calibrated | Against data not used for fitting |

| Publication                | HPV type             | Transmission per sexual partnership<br>(or per intercourse*) |            | Rate of clearance<br>(or rate of loss of natural immunity**) |                                                            |            | Validation             |
|----------------------------|----------------------|--------------------------------------------------------------|------------|--------------------------------------------------------------|------------------------------------------------------------|------------|------------------------|
|                            |                      | Values<br>(probability)                                      | Source     | Pattern of immune response following infection clearance (%) | Values<br>(person-year)                                    | Source     |                        |
|                            | 18                   | Males to females: 0.47*<br>Females to males: 0.37*           |            |                                                              | Relative clearance rates: 1.25 (HPV16 reference category)  |            |                        |
|                            | HR                   | Males to females: 0.36*<br>Females to males: 0.27*           |            |                                                              | Relative clearance rates: 1.17 (HPV16 reference category)  |            |                        |
| Baussano et al., 2011 (19) | 16                   | 0.4<br><br>Decreasing with age: 0.28 to 0.11                 | Calibrated | SIR<br><br>SIS                                               | Decreasing with time elapsed since infection: 1.6 to 0.036 | Calibrated | Against published data |
| Johnson et al., 2012 (22)  | 16<br>18<br>31<br>33 | 0.72<br>0.74<br>0.74<br>0.75                                 | Calibrated | SIRS                                                         | 0.24**<br>0.17**<br>0.18**<br>0.18**                       | Calibrated | Not reported           |

| Publication                | HPV type | Transmission per sexual partnership<br>(or per intercourse*) |            | Rate of clearance<br>(or rate of loss of natural immunity**) |                         |            | Validation   |
|----------------------------|----------|--------------------------------------------------------------|------------|--------------------------------------------------------------|-------------------------|------------|--------------|
|                            |          | Values<br>(probability)                                      | Source     | Pattern of immune response following infection clearance (%) | Values<br>(person-year) | Source     |              |
|                            | 35       | 0.75                                                         |            |                                                              | 0.16**                  |            |              |
|                            | 39       | 0.75                                                         |            |                                                              | 0.21**                  |            |              |
|                            | 45       | 0.74                                                         |            |                                                              | 0.16**                  |            |              |
|                            | 51       | 0.75                                                         |            |                                                              | 0.19**                  |            |              |
|                            | 52       | 0.74                                                         |            |                                                              | 0.27**                  |            |              |
|                            | 56       | 0.74                                                         |            |                                                              | 0.17**                  |            |              |
|                            | 58       | 0.76                                                         |            |                                                              | 0.20**                  |            |              |
|                            | 59       | 0.74                                                         |            |                                                              | 0.15**                  |            |              |
|                            | 66       | 0.76                                                         |            |                                                              | 0.17**                  |            |              |
| Vanni et al.,<br>2012 (41) | 16<br>18 | 0.55<br>0.52                                                 | Calibrated | SIS                                                          | 0.52                    | Calibrated | Not reported |

HR: High-risk; SIS: susceptible-infected-susceptible; SIR: susceptible-infected-recovered/immune; SIRS: susceptible-infected-recovered/immune-susceptible
